# Supplementary material
Source: HighWire-hosted journal article supplement (https://diabetes.diabetesjournals.org/content/suppl/2006/04/27/55.5.1337)

### Supplementary data 1: Review of studies of Adiponectin levels in Children

| Mean age (y) or range | Population                                                        | Inverse association with BMI/obesity ?               | First author  | Year | Ref  |
|-----------------------|-------------------------------------------------------------------|------------------------------------------------------|---------------|------|------|
| 1 & 2                 | 65 SGA children<br>20 AGA children                                | No                                                   | Iniguez       | 2004 | (18) |
| 5.4<br>5.9            | 32 pre-pubertal SGA children<br>37 pre-pubertal AGA children      | only among SGA                                       | López-Bermejo | 2004 | S1   |
| 5 & 10                | 83 Pima Indian children                                           | Yes                                                  | Stefan        | 2002 | (31) |
| 6 to 9                | 51 obese children<br>+ 51 controls                                | Yes                                                  | Valle         | 2005 | S2   |
| <i>"Pre-pubertal"</i> | 34 obese prepubertal children<br>+ 20 controls                    | Yes                                                  | Gil Campos    | 2004 | S3   |
| 8.6<br>10.5<br>10.6   | 51 SGA children<br>17 short AGA children<br>24 obese AGA children | only among SGA                                       | Cianfarani    | 2004 | (19) |
| 3 to 17               | 135 obese children<br>200 controls                                | Yes                                                  | Bottner       | 2004 | (35) |
| 6 to 18               | 500 children aged 6-18 years                                      | Only in girls, and in boys >15y                      | Tsou          | 2004 | (33) |
| 8 to 13               | 100 obese boys                                                    | No association with % body fat<br>(BMI not reported) | Ogawa         | 2005 | S4   |
| 8 to 16               | 40 children with type 2 diabetes and 73<br>mainly obese children  | Yes                                                  | Cruz          | 2004 | (13) |
| 10 to 19              | 230 children                                                      | Yes                                                  | Huang         | 2004 | S5   |
| 12.7                  | 30 children (several obese)                                       | Yes                                                  | Nemet         | 2003 | S6   |
| ~13                   | 439 obese, 31 overweight, and 20 non-<br>obese children           | Yes                                                  | Weiss         | 2004 | (12) |
| 13.3                  | 26 obese adolescents<br>+ 23 controls                             | Yes                                                  | Bacha         | 2004 | (32) |
| 12 to 21              | 46 African American and 40 White<br>children – several obese      | Yes                                                  | Degawa        | 2003 | S7   |

AGA: appropriate (birthweight) for gestational age; SGA: small for gestational age

### **Additional References for Supplementary data 1**

- S1. Lopez-Bermejo A, Casano-Sancho P, Fernandez-Real JM, Kihara S, Funahashi T, Rodriguez-Hierro F, Ricart W, Ibanez L. Both intrauterine growth restriction and postnatal growth influence childhood serum concentrations of adiponectin. *Clin Endocrinol (Oxf)* 61:339-46, 2004
- S2. Valle M, Martos R, Gascon F, Canete R, Zafra MA, Morales R. Low-grade systemic inflammation, hypoadiponectinemia and a high concentration of leptin are present in very young obese children, and correlate with metabolic syndrome. *Diabetes Metab* 31:55-62, 2005
- S3. Gil-Campos M, Canete R, Gil A. Hormones regulating lipid metabolism and plasma lipids in childhood obesity. *Int J Obes Relat Metab Disord. Suppl* 3:S75-80, 2004
- S4. Ogawa Y, Kikuchi T, Nagasaki K, Hiura M, Tanaka Y, Uchiyama M. Usefulness of serum adiponectin level as a diagnostic marker of metabolic syndrome in obese Japanese children. *Hypertens Res* 28:51-7, 2005
- S5. Huang KC, Lue BH, Yen RF, Shen CG, Ho SR, Tai TY, Yang WS. Plasma adiponectin levels and metabolic factors in nondiabetic adolescents. *Obes Res* 12:119-24, 2004
- S6. Nemet D, Wang P, Funahashi T, Matsuzawa Y, Tanaka S, Engelman L, Cooper DM. Adipocytokines, body composition, and fitness in children. *Pediatr Res* 53:148-52, 2003
- S7. Degawa-Yamauchi M, Dilts JR, Bovenkerk JE, Saha C, Pratt JH, Considine RV. Lower serum adiponectin levels in African-American boys. *Obes Res* 11:1384-90, 2003

## **Supplementary data 2: Truncal fat mass in the ALSPAC cohort at age 9y**

### **Methods**

At age 9.9 (+/- 0.33) years all children were invited to attend for a 3-hour hands-on assessment. Height was measured with shoes and socks removed using a Harpenden stadiometer (Holtain Ltd, Crymych, Pembrokeshire, UK). Weight was measured using a Tanita TBF 305 body fat analyser and weighing scales (Tanita UK Ltd, Yewsey, Middlesex, UK). Total fat (FM), central fat and lean mass (LM) were measured using a Lunar Prodigy DXA scanner (GE Medical Systems Lunar, Madison, WI, USA). The scans were visually inspected and realigned where necessary. Trunk fat mass (TFM) was estimated using the automatic region of interest that included chest, abdomen and pelvis. Valid scans were available for analysis in 765 of the 839 children with adiponectin values.

### **Results**

Girls had 56% greater truncal fat than boys (Fig. S-1).

**Figure S-1:** Boxplots of Truncal fat in boys and girls (line = median; box = inter-quartile range; whiskers = data within 1.5 box lengths; outliers > 1.5 box lengths from top of box).

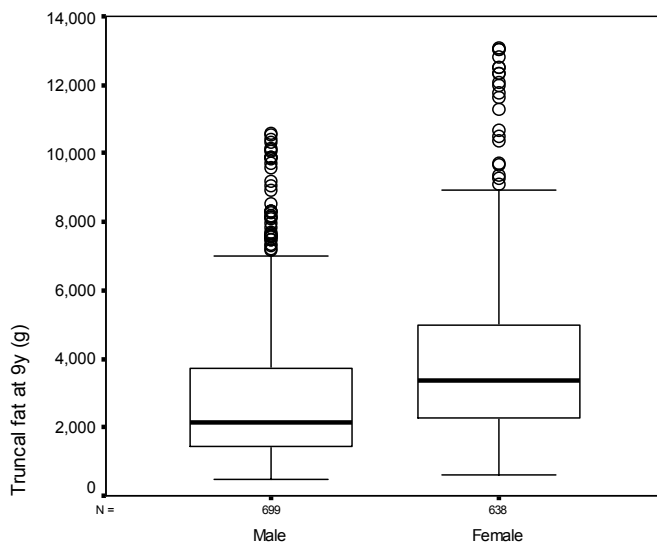

Boys (but not girls; Fig S-2) showed an inverse U-shaped association between

adiponectin (at 8y) and truncal fat mass (at 9y) (quadratic term =  $-6.73 \text{ E-}08 \pm 2.59 \text{ E-}08$ ;  $p=0.0097$ ). Therefore, with increasing truncal fat mass, boys start to show an inverse association between adiponectin (as seen in girls and in adults).

**Figure S-2:** Curve fitting plots of adiponectin vs. truncal fat in boys and girls.

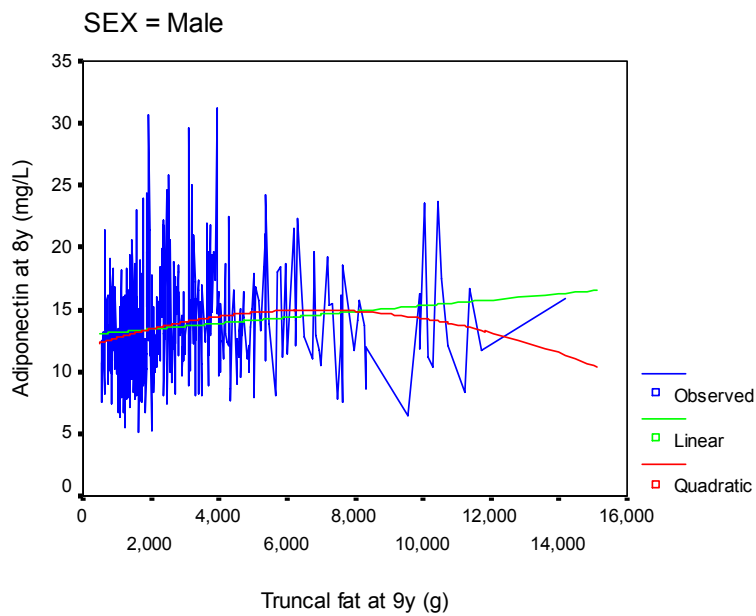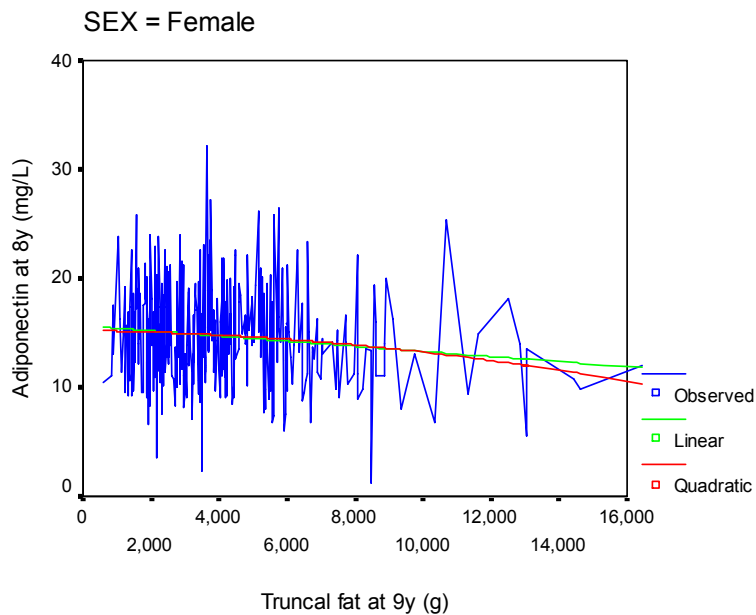

Supplement: db1272OnlineAppendix.pdf [file db1272OnlineAppendix.pdf]
